# Supplementary material for: Lead and manganese levels in serum and erythrocytes in Alzheimer's disease and mild cognitive impairment: results from the Australian Imaging, Biomarkers and Lifestyle Flagship Study of Ageing
Source: Royal Society of Chemistry journal article supplement (doi:10.1039/c6mt00019c), 2016-01-01
Supplement: c6mt00019c1.pdf [file c6mt00019c1.pdf]

**Supplementary Information for:**

**Lead and manganese levels in serum and erythrocytes in Alzheimer's disease and mild cognitive impairment: Results from the Australian Imaging, Biomarkers and Lifestyle Flagship Study of Ageing**

*Dominic J. Hare, Noel G. Faux, Blaine R. Roberts, Irene Volitakis, Ralph N. Martins and Ashley I. Bush*

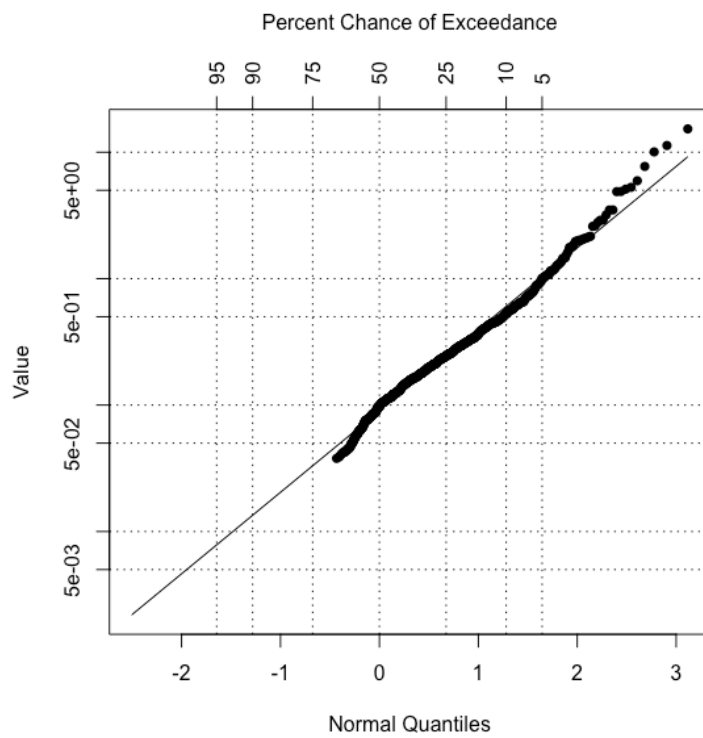

**Supplementary Figure S1:** Probability plot of all serum lead data, showing fit to a log-normal distribution.

**Supplementary Table S1:** Summary of statistics for the serum lead difference between diagnostic groups.  $^a \mu\text{g L}^{-1}$

| Diagnostic classification | <i>n</i> | <i>n</i> <sub>left censored</sub> | Median <sup>a</sup> | Mean <sup>a</sup> | Standard deviation |
|---------------------------|----------|-----------------------------------|---------------------|-------------------|--------------------|
| HC                        | 758      | 293                               | 0.089               | 0.297             | 0.938              |
| MCI                       | 129      | 43                                | 0.106               | 0.280             | 0.602              |
| AD                        | 206      | 75                                | 0.110               | 0.262             | 0.604              |

**Supplementary Table S2:** Summary of statistics for the serum manganese difference between diagnostic groups.  $^a \mu\text{g L}^{-1}$

| DX        | mean          | median | range          |
|-----------|---------------|--------|----------------|
| HC (758)  | 0.923 (0.699) | 0.783  | 0.444 - 11.408 |
| MCI (129) | 0.851 (0.368) | 0.774  | 0.493 - 4.335  |
| AD (206)  | 0.819 (0.253) | 0.768  | 0.427 - 1.974  |

**Supplementary Table S3:** ANOVA (type II test) of manganese variables.

|                         | Sum of squares         | <i>D<sub>f</sub></i> | <i>F</i> -value        | <i>p</i> (> <i>F</i> )  |
|-------------------------|------------------------|----------------------|------------------------|-------------------------|
| Age                     | $2.148 \times 10^{-5}$ | 1                    | $2.049 \times 10^{-4}$ | 0.989                   |
| Clinical classification | 1.293                  | 2                    | 6.17                   | 0.002                   |
| Sex                     | 0.647                  | 1                    | 6.169                  | 0.014                   |
| Collection site         | 4.743                  | 1                    | 45.26                  | $2.791 \times 10^{-11}$ |
| Assay date              | 8.236                  | 5                    | 15.72                  | $5.861 \times 10^{-15}$ |
| Residuals               | 113.4                  | 1083                 | -                      | -                       |

**Supplementary Table S4:** Summary of statistics for erythrocyte lead and manganese difference between diagnostic groups.  $^a \mu\text{g L}^{-1}$

| DX      | Pb mean (sd)  | Pb median | Pb range      | Mn mean (sd)  | Mn median | Mn range      |
|---------|---------------|-----------|---------------|---------------|-----------|---------------|
| HC (40) | 2.025 (1.088) | 1.789     | 0.62 - 4.485  | 0.589 (0.256) | 0.580     | 0.128 - 1.423 |
| AD (39) | 1.993 (1.119) | 1.676     | 0.366 - 6.009 | 0.647 (0.339) | 0.582     | 0.111 - 1.857 |
